# Supplementary material for: Molecular Epidemiology of Emerging Carbapenem Resistance in Acinetobacter nosocomialis and Acinetobacter pittii in Taiwan, 2010 to 2014
Source: PubMed Central journal article supplement (PMC6496155; doi:10.1128/aac.02007-18), 2019-03-27

Supplementary Table S1. Antimicrobial resistance in *A. baumannii* from the 2010-2014 TSAR collection

|        | TSAR VII (2010) |      | TSAR VIII (2012) |      | TSAR IX (2014) |      | Overall |      |
|--------|-----------------|------|------------------|------|----------------|------|---------|------|
|        | N = 321         |      | N = 332          |      | N = 226        |      | N = 879 |      |
|        | N               | %    | N                | %    | N              | %    | N       | %    |
| AMK    | 226             | 70.4 | 246              | 74.1 | 149            | 65.9 | 621     | 70.6 |
| AMS    | 168             | 52.3 | 206              | 62   | 106            | 46.9 | 480     | 54.6 |
| CAZ    | 251             | 78.2 | 269              | 81   | 169            | 74.8 | 689     | 78.4 |
| CIP    | 265             | 82.6 | 280              | 84.3 | 180            | 79.6 | 725     | 82.5 |
| FEP    | 161             | 50.2 | 211              | 63.6 | 89             | 39.4 | 461     | 52.4 |
| GEN    | 255             | 79.4 | 267              | 80.4 | 164            | 72.6 | 686     | 78   |
| IPM    | 210             | 65.4 | 254              | 76.5 | 148            | 65.5 | 612     | 69.6 |
| LEV    | 174             | 54.2 | 240              | 72.3 | 147            | 65   | 561     | 63.8 |
| MEM    | 211             | 65.7 | 254              | 76.5 | 149            | 65.9 | 614     | 69.9 |
| COL    | 0               | 0    | 0                | 0    | 2              | 0.9  | 2       | 0.2  |
| TG > 1 | 7               | 2.2  | 68               | 20.5 | 22             | 9.7  | 97      | 11   |
| TZP    | 225             | 70.1 | 268              | 80.7 | 156            | 69   | 649     | 73.8 |

<sup>a</sup> AMK, amikacin; AMS, ampicillin/sulbactam; CAZ, ceftazidime; CIP, ciprofloxacin; FEP, cefepime; GEN, gentamicin; IPM,

imipenem; LEV, levofloxacin; MEM, meropenem; COL, colistin; TG > 1, tigecycline MIC > 1 mg/L; TZP, piperacillin/tazobactam

Supplementary Table S2. Antimicrobial resistance in *A. nosocomialis* and *A. pittii* from the 2010-2014 TSAR collection

|        | TSAR VII (2010) |     | TSAR VIII (2012) |      | TSAR IX (2014) |      | Overall |      |
|--------|-----------------|-----|------------------|------|----------------|------|---------|------|
|        | N = 40          |     | N = 58           |      | N = 64         |      | N = 162 |      |
|        | N               | %   | N                | %    | N              | %    | N       | %    |
| AMK    | 1               | 2.5 | 1                | 1.7  | 2              | 3.1  | 4       | 2.5  |
| AMS    | 1               | 2.5 | 1                | 1.7  | 4              | 6.3  | 6       | 3.7  |
| CAZ    | 1               | 2.5 | 0                | 0    | 2              | 3.1  | 3       | 1.9  |
| CIP    | 6               | 15  | 12               | 20.7 | 16             | 25   | 34      | 21   |
| FEP    | 2               | 5   | 2                | 3.4  | 6              | 9.4  | 10      | 6.2  |
| GEN    | 6               | 15  | 12               | 20.7 | 19             | 29.7 | 37      | 22.8 |
| IPM    | 3               | 7.5 | 9                | 15.5 | 14             | 21.9 | 26      | 16   |
| LEV    | 3               | 7.5 | 9                | 15.5 | 13             | 20.3 | 25      | 15.4 |
| MEM    | 3               | 7.5 | 8                | 13.8 | 14             | 21.9 | 25      | 15.4 |
| COL    | 0               | 0   | 0                | 0    | 1              | 1.6  | 1       | 0.6  |
| TG > 1 | 0               | 0   | 2                | 3.4  | 1              | 1.6  | 3       | 1.9  |
| TZP    | 2               | 5   | 7                | 12.1 | 16             | 25   | 25      | 15.4 |

<sup>a</sup> AMK, amikacin; AMS, ampicillin/sulbactam; CAZ, ceftazidime; CIP, ciprofloxacin; FEP, cefepime; GEN, gentamicin; IPM,

imipenem; LEV, levofloxacin; MEM, meropenem; COL, colistin; TG > 1, tigecycline MIC > 1 mg/L; TZP, piperacillin/tazobactam

Supplementary Table S3. Comparison of patient characteristics of *A. baumannii* versus *A.*

*nosocomialis* and *A. pittii* from the 2010-2014 TSAR collection

|                                     | <i>A. baumannii</i> |      | <i>A. nosocomialis</i> and <i>A. pittii</i> |      | P-value <sup>a</sup> |
|-------------------------------------|---------------------|------|---------------------------------------------|------|----------------------|
|                                     | N = 879             |      | N = 162                                     |      |                      |
|                                     | N                   | %    | N                                           | %    |                      |
| <b>Hospital type</b>                |                     |      |                                             |      |                      |
| Medical centers                     | 364                 | 41.4 | 94                                          | 58.0 | < 0.001              |
| <b>Region</b>                       |                     |      |                                             |      | < 0.001              |
| North                               | 243                 | 27.7 | 71                                          | 43.8 |                      |
| Central                             | 370                 | 42.1 | 35                                          | 21.6 |                      |
| South                               | 184                 | 20.9 | 43                                          | 26.5 |                      |
| East                                | 82                  | 9.3  | 13                                          | 8.0  |                      |
| <b>Specimen type</b>                |                     |      |                                             |      | < 0.001              |
| Respiratory                         | 476                 | 54.2 | 61                                          | 37.7 |                      |
| Blood                               | 131                 | 14.9 | 68                                          | 42.0 |                      |
| Urine                               | 121                 | 13.8 | 9                                           | 5.6  |                      |
| Pus/discharge                       | 99                  | 11.3 | 15                                          | 9.3  |                      |
| Others                              | 52                  | 5.9  | 9                                           | 5.6  |                      |
| <b>Age<sup>b</sup></b>              |                     |      |                                             |      | < 0.001              |
| < 18                                | 24                  | 2.7  | 9                                           | 5.6  |                      |
| 18-65                               | 280                 | 31.9 | 67                                          | 41.4 |                      |
| > 65                                | 571                 | 65.0 | 86                                          | 53.1 |                      |
| <b>Patient location<sup>b</sup></b> |                     |      |                                             |      | < 0.001              |
| OPD/ER                              | 71                  | 8.1  | 14                                          | 8.6  |                      |
| Non-ICU                             | 469                 | 53.4 | 118                                         | 72.8 |                      |
| ICU                                 | 337                 | 38.3 | 30                                          | 18.5 |                      |

<sup>a</sup> Chi-squared test

<sup>b</sup> Information regarding age and patient location was not available for some patients.

Supplementary Table S4. Comparison of plasmids carrying *bla*<sub>OXA-58-like</sub> in this study and in the NCBI database

| Isolate No.<br>Accession No. | Plasmid<br>size | Upstream<br>insertion<br>sequences | Accession No. of the<br>best matched plasmid,<br>host species | Plasmid<br>size | Carbapenemase gene in<br>the best matched<br>plasmid | Coverage | Similarity |
|------------------------------|-----------------|------------------------------------|---------------------------------------------------------------|-----------------|------------------------------------------------------|----------|------------|
| 2010S01-197<br>CP033563      | 92 K            | IS1006-<br>ISAba3                  | No comparative<br>plasmid                                     | -               | -                                                    | -        | -          |
| 2012C01-137<br>CP033558      | 91 K            | IS15DI- ISAba3                     | CP026086.1, <i>A. pittii</i>                                  | 112 K           | <i>bla</i> <sub>OXA-58-like</sub>                    | 96%      | 99%        |
| 2014N23-120<br>CP033547      | 79 K            | IS15DI- ISAba3                     | CP026086.1, <i>A. pittii</i>                                  | 112 K           | <i>bla</i> <sub>OXA-58-like</sub>                    | 98%      | 99%        |
| 2012N21-164<br>CP033537      | 73 K            | IS1008-<br>ISAba3                  | LN833432.1, <i>A.</i><br><i>baumannii</i>                     | 85 K            | <i>bla</i> <sub>NDM-1</sub>                          | 67%      | 98%        |
| 2014S07-126<br>CP033531      | 284 K           | ISAba3                             | CP010351.1, <i>A.</i><br><i>johnsonii</i>                     | 399 K           | Not detected                                         | 87%      | 99%        |

Supplementary Table S5. Primers used to detect for *bla*<sub>OXA-58-like</sub> and its upstream regions, pAB-NCGM253, and *bla*<sub>OXA-213/272-like</sub>

| Target                                              | Primers                | Sequences                    | Size (bp) | Reference                   |
|-----------------------------------------------------|------------------------|------------------------------|-----------|-----------------------------|
| <i>bla</i> <sub>OXA-58-like</sub>                   | OXA-58-like-F          | CGATCAGAATGTTCAAGCGC         | 523       | Poirel et al <sup>a</sup>   |
|                                                     | OXA-58-like-R          | CCCCTCTGCGCTCTACATAC         |           | Woodford et al <sup>b</sup> |
| IS <i>Aba3</i> - <i>bla</i> <sub>OXA-58-like</sub>  | IS <i>Aba3</i> -2F     | TATACTATCACTGAGGCAGGTT       | 773       | This study                  |
|                                                     | OXA-58-like-R          | CCCCTCTGCGCTCTACATAC         |           | Woodford et al <sup>b</sup> |
| Hybrid promoters- <i>bla</i> <sub>OXA-58-like</sub> | Hybrid-P <sub>C2</sub> | TTGCAACAGTG <u>CC</u> ATTTT  | 795       | This study                  |
|                                                     | Hybrid-P <sub>C3</sub> | TTGCAACAGTG <u>CCC</u> ATTTT |           | This study                  |
|                                                     | OXA-58-like-R          | CCCCTCTGCGCTCTACATAC         |           | Woodford et al <sup>b</sup> |
| IS15DI- <i>bla</i> <sub>OXA-58-like</sub>           | IS15DI-F               | TACAGATACGCCAGCGG            | 1124      | This study                  |
|                                                     | OXA-58-like-R          | CCCCTCTGCGCTCTACATAC         |           | Woodford et al <sup>b</sup> |
| IS1006- <i>bla</i> <sub>OXA-58-like</sub>           | IS1006-F               | GGAAGGTAAATGTCCACCAGACC      | 1084      | This study                  |
|                                                     | OXA-58-like-R          | CCCCTCTGCGCTCTACATAC         |           | Woodford et al <sup>b</sup> |
| IS1008- <i>bla</i> <sub>OXA-58-like</sub>           | IS1008-F               | CCTACAGATTTACATTCATGGC       | 1330      | This study                  |
|                                                     | OXA-58-like-R          | CCCCTCTGCGCTCTACATAC         |           | Woodford et al <sup>b</sup> |

|                                                                                        |               |                            |                   |            |
|----------------------------------------------------------------------------------------|---------------|----------------------------|-------------------|------------|
| Exclusively<br><i>bla</i> <sub>OXA-272-like</sub>                                      | AP-OXA272-F   | CCATTGGTACGATGT            | 265               | This study |
|                                                                                        | AP-OXA272-R   | TGTTGCTTTATGATGC           |                   | This study |
| <i>bla</i> <sub>OXA-213-like</sub> not<br>including <i>bla</i> <sub>OXA-272-like</sub> | AC-OXA213-F   | CGCCCTCTAGAATGAGTATTCAAC   | 150               | This study |
|                                                                                        | AC-OXA213-R   | GTGAAGGATCCTTACCAATGCTTAAT |                   | This study |
|                                                                                        |               |                            |                   |            |
| pAB-NCGM253                                                                            | OXA24-NCGM1-F | TATGTACTCATGATTGTACA       | 1980 <sup>c</sup> | This study |
|                                                                                        | OXA24-NCGM1-R | GCTTAATATGACTTTAGCAT       |                   | This study |
|                                                                                        | OXA24-NCGM2-F | CATATTCTGTGTGAGATAGC       | 1990 <sup>c</sup> | This study |
|                                                                                        | OXA24-NCGM2-R | ATTAAAGTTTTACAGAATAA       |                   | This study |
|                                                                                        | OXA24-NCGM3-F | CGAATAGAACCAGACATTCC       | 1373 <sup>c</sup> | This study |
|                                                                                        | OXA24-NCGM3-R | AACCATGCTCATATTTGTTTCG     |                   | This study |
|                                                                                        | OXA24-NCGM4-F | TCTAAAATTAACATAATACG       | 2180 <sup>c</sup> | This study |
|                                                                                        | OXA24-NCGM4-R | GTCACGCCAGTATTAACCAA       |                   | This study |
|                                                                                        | OXA24-NCGM5-F | CGCCATAAATTACACCTCT        | 1241 <sup>d</sup> | This study |
|                                                                                        | OXA24-NCGM5-R | AGGCATTGTCCTTTACAAC        |                   | This study |

|  |               |                         |                  |            |
|--|---------------|-------------------------|------------------|------------|
|  | OXA24-NCGM6-F | AAATCATCCGAATCATTAGTGCA | 889 <sup>e</sup> | This study |
|  | OXA24-NCGM6-R | GACTTAGCTAAACTTGGTTCAAC |                  | This study |

<sup>a</sup> Poirel L, Marqué S, Héritier C et al. OXA-58, A Novel Class D  $\beta$ -Lactamase Involved in Resistance to Carbapenems in *Acinetobacter baumannii*. *Antimicrob Agents Chemother* 2005; **49**: 202–208.

<sup>b</sup> Woodford N, Ellington MJ, Coelho JM et al. Multiplex PCR for genes encoding prevalent OXA carbapenemases in *Acinetobacter* spp. *Int J Antimicrob Agents* 2006; **27**: 351-3.

<sup>c</sup> 30 cycles of denaturation at 94 °C for 30 s, annealing at 53°C for 30s and elongation at 72 °C for 2.5 min.

<sup>d</sup> 30 cycles of denaturation at 94 °C for 30 s, annealing at 58°C for 30s and elongation at 72 °C for 1.5 min.

<sup>e</sup> 30 cycles of denaturation at 94 °C for 30 s, annealing at 54°C for 30s and elongation at 72 °C for 1 min.

Supplementary Table S6. Detection of *bla*<sub>OXA-272-like</sub> in *Acinetobacter* spp. by PCR

|                                                    | <i>A. baumannii</i> (n = 20) |           | <i>A. nosocomialis</i> (n = 20) |           | <i>A. pittii</i> (n = 20) |
|----------------------------------------------------|------------------------------|-----------|---------------------------------|-----------|---------------------------|
|                                                    | CR                           | CS        | CR                              | CS        | CS                        |
|                                                    | (n = 10)                     | (n = 10)  | (n = 10)                        | (n = 10)  | (n = 20)                  |
| No. of isolates from each hospital <sup>a</sup>    | 1/2/5/2                      | 0/7/1/2   | 3/4/2/1                         | 3/3/1/3   | 14/0/0/6                  |
| Year                                               | 2010-2013                    | 2004-2013 | 2003-2015                       | 2004-2013 | 2012-2014                 |
| Imipenem MIC range                                 | 8-128                        | 0.25-2    | 8-64                            | 0.125-2   | 0.25-1                    |
| Meropenem MIC range                                | 8-64                         | 0.25-2    | 8-128                           | 0.25-2    | 0.25-0.5                  |
| Carbapenemase genes <sup>b</sup>                   |                              |           |                                 |           |                           |
| <i>bla</i> <sub>OXA-23-like</sub>                  | 8                            | 0         | 1                               | 0         | 0                         |
| <i>bla</i> <sub>OXA-24-like</sub>                  | 2                            | 0         | 5                               | 0         | 0                         |
| IS <i>Aba1</i> - <i>bla</i> <sub>OXA-51-like</sub> | 2                            | 0         | 0                               | 0         | 0                         |
| Hybrid promoter- <i>bla</i> <sub>OXA-58-like</sub> | 1                            | 0         | 4                               | 0         | 0                         |
| <i>bla</i> <sub>OXA-272-like</sub>                 | 0                            | 0         | 0                               | 0         | 20                        |
| <i>bla</i> <sub>IMP</sub>                          | 0                            | 0         | 0                               | 0         | 0                         |
| <i>bla</i> <sub>VIM</sub>                          | 0                            | 0         | 0                               | 0         | 0                         |

CR, carbapenem-resistant; CS, carbapenem-susceptible

<sup>a</sup> Hospitals included Tri-Service General Hospital, Taipei Veterans General Hospital, Mackay Memorial Hospital, and Changhua

Christian Hospital.

<sup>b</sup> An isolate may contain multiple carbapenemase genes.



Supplementary Figure S1. Dendrogram of amino acid sequences of carbapenem-hydrolyzing class D  $\beta$ -lactamases (CHDL) in *A. calcoaceticus-baumannii* complex isolates and intrinsic CHDLs in other *Acinetobacter* species (a) and comparison of the amino acid sequences of OXA-272-like and OXA-213-like (b). (a) Amino acid sequences of our isolates and amino acid sequences from NCBI were compared. Accession no. (or isolate no. from this study), and CHDL type are indicated. The CHDL in *A. pittii* belonged to OXA-272-like and those in *A. calcoaceticus* belonged to OXA-213-like. The species was identified based on the sequence of *gyrB*. (b) Multiple amino acid sequence alignment was generated using default settings of CLUSTALW at [https://npsa-prabi.ibcp.fr/cgi-bin/npsa\\_automat.pl?page=/NPSA/npsa\\_server.html](https://npsa-prabi.ibcp.fr/cgi-bin/npsa_automat.pl?page=/NPSA/npsa_server.html).

(a)

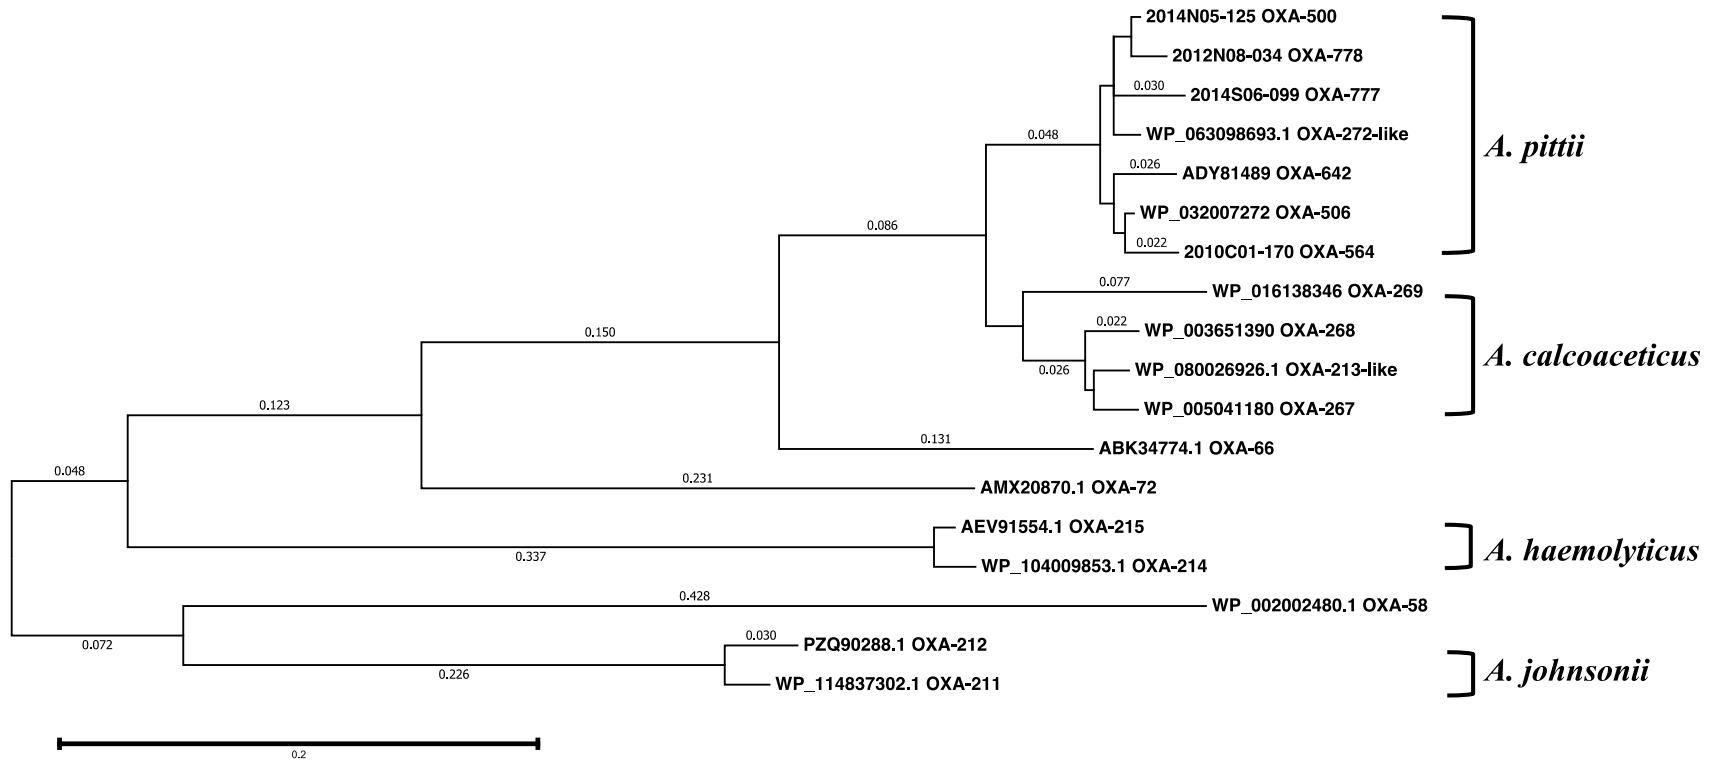



Supplementary Figure S2. Scheme to identify the genetic background of *bla*<sub>OXA-58</sub> (a) and validation of the mixture of forward primers in step 3 (b). The number of cytosines in hybrid promoter regions, which are underlined in (a), differed in our isolates and ranged from one to three in isolates C<sub>2</sub> (2012N21-164), C<sub>3</sub> (2014N23-120), and C<sub>4</sub> (2010S01-197), respectively. Sequences deposited in NCBI also showed this variation (accession no. CP026086.1, JQ241789, and GU327621.1). Therefore, three sets of forward primers (Hybrid-P<sub>C2</sub>, -P<sub>C3</sub>, and -P<sub>C4</sub>) were designed. PCR with the mixture of Hybrid-P<sub>C2</sub> and Hybrid -P<sub>C3</sub> primers yielded the best results. M, marker; NC negative control.

(a)

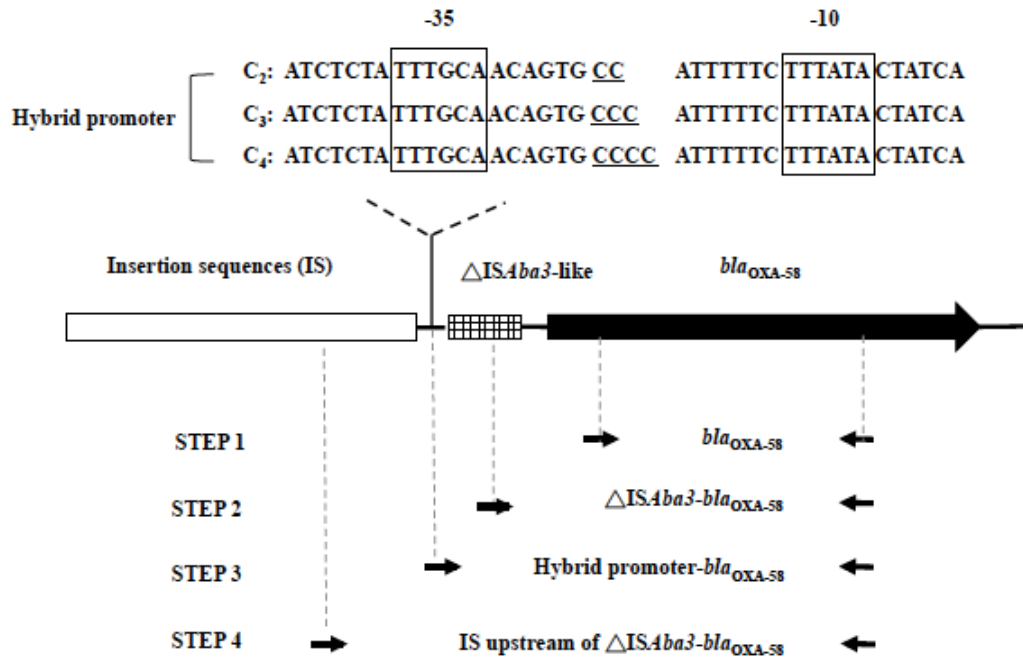

(b)

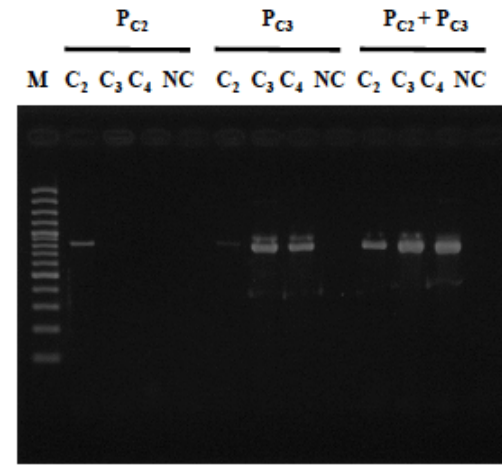

Supplement: AAC.02007-18-s0001.pdf [file AAC.02007-18-s0001.pdf]
